# Supplementary material for: Mechanism of ammonium bisulfate deposition on V1M5/Ti catalysts with synergistic effects of V and M (M = Ce, Co, Fe, and Mn) in low-temperature NH3-SCR
Source: Royal Society of Chemistry journal article supplement (doi:10.1039/d3cy01801f), 2024-01-01
Supplement: d3cy01801f1.pdf [file d3cy01801f1.pdf]

## Supplementary Material

### **Mechanism of ammonium bisulfate deposition on $V_1M_5/Ti$ catalysts with synergistic effect of V and M (M=Ce, Co, Fe, Mn) in the selective catalytic reduction of NO with $NH_3$ at low temperatures**

Zhicheng Xu<sup>1,3</sup>, Jin Xiong<sup>1</sup>, Yuran Li<sup>1\*</sup>, Junxiang Guo<sup>1</sup>, Bin Wang<sup>1</sup>, Tingyu Zhu<sup>1,2\*</sup>

<sup>1</sup> CAS Key Laboratory of Green Process and Engineering, Institute of Process Engineering, Innovation Academy for Green Manufacture, Chinese Academy of Sciences, Beijing 100190, China

<sup>2</sup> Center for Excellence in Regional Atmospheric Environment, Institute of Urban Environment, Chinese Academy of Sciences, Xiamen 361021, China

<sup>3</sup> Environmental Protection Research Institute, Beijing Research Institute of Chemical Industry, SINOPEC, Beijing 100013, China

**\*Corresponding author**

E-mail: yrli@ipe.ac.cn (Yuran Li), tyzhu@ipe.ac.cn (Tingyu Zhu)

## Results and discussion

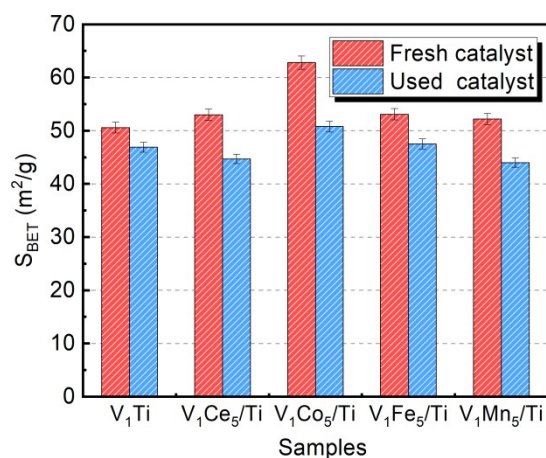

**Fig. S1** The change of specific surface area before and after the reaction in the presence of SO<sub>2</sub> and H<sub>2</sub>O on various catalysts

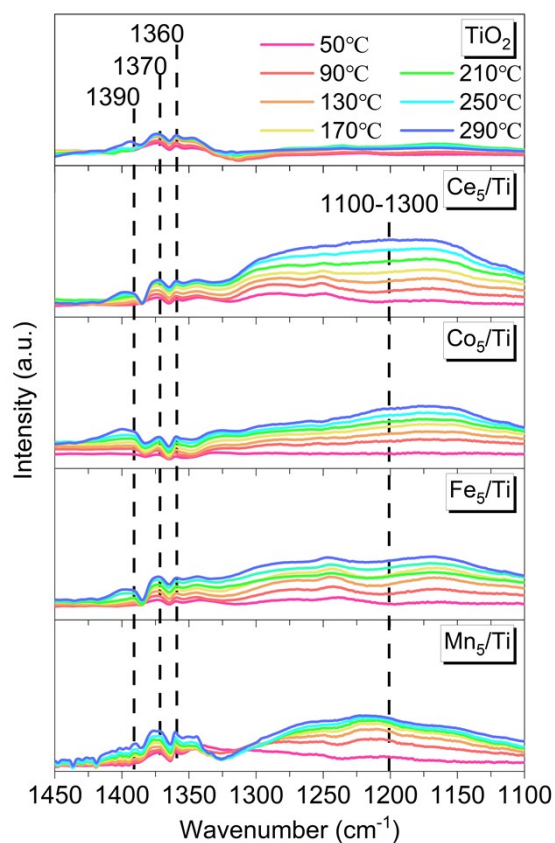

**Fig. S2** In situ DRIFTS spectra of the carriers at various temperatures (Samples were treated at 1000 ppm SO<sub>2</sub> and 6% O<sub>2</sub>)

In situ DRIFTS spectra have been collected for various supports, with results

shown in Fig. S2. The peak at  $1390\text{ cm}^{-1}$  is attributed to tridentate sulfate, the wide peaks at  $1100 - 1300\text{ cm}^{-1}$  are attributed to monodentate sulfate and bidentate sulfate [1, 2], the two peaks at  $1370\text{ cm}^{-1}$  and  $1360\text{ cm}^{-1}$  belong to the vibration of gaseous  $\text{SO}_2$  [3, 4]. The tridentate sulfate peak occurs on  $\text{TiO}_2$  above  $290\text{ }^\circ\text{C}$ , indicating that the  $\text{TiO}_2$  carrier without active sites hardly oxidizes  $\text{SO}_2$  to tridentate sulfate at low temperature. The intensity of tridentate sulfate peak is much lower on various carriers without V sites, and the monodentate sulfate and bidentate sulfate peaks occur on  $\text{M}_5/\text{Ti}$  carriers. It is indicated that the V sites as main active sites oxidize  $\text{SO}_2$  to form tridentate sulfate and transitional metal sites as main active sites oxidize  $\text{SO}_2$  to form monodentate sulfate and bidentate sulfate.

## References

- [1] C. Li, M. Shen, T. Yu, J. Wang, J. Wang, Y. Zhai, The mechanism of ammonium bisulfate formation and decomposition over V/WTi catalysts for NH<sub>3</sub>-selective catalytic reduction at various temperatures, *Phys. Chem. Chem. Phys.*, 19 (2017) 15194-15206. <http://doi.org/10.1039/c7cp02324c>.
- [2] F. Gao, X. Tang, H. Yi, J. Li, S. Zhao, J. Wang, C. Chu, C. Li, Promotional mechanisms of activity and SO<sub>2</sub> tolerance of Co- or Ni-doped MnO<sub>x</sub>-CeO<sub>2</sub> catalysts for SCR of NO<sub>x</sub> with NH<sub>3</sub> at low temperature, *Chem. Eng. J.*, 317 (2017) 20-31. <http://doi.org/10.1016/j.cej.2017.02.042>.
- [3] K.-Q. Wang, X.-M. Gao, B. Lin, D.-X. Hua, Y. Yan, H.-Y. Zhao, W.-D. Xiao, An efficient calcium-based sorbent for flue gas dry-desulfurization: promotion roles of nitrogen oxide and oxygen, *RSC Advances*, 13 (2023) 1312-1319. <http://doi.org/10.1039/d2ra05769g>.
- [4] Y. Lyu, J. Xu, Q. Cao, Z. Zhou, W. Hu, X. Liu, Highly efficient removal of toluene over Cu-V oxides modified  $\gamma$ -Al<sub>2</sub>O<sub>3</sub> in the presence of SO<sub>2</sub>, *J. Hazard. Mater.*, 436 (2022). <http://doi.org/10.1016/j.jhazmat.2022.129041>.
